# Supplementary material
Source: PubMed Central journal article supplement (PMC6999587)
Supplement: ELSC-19-658-s001.pdf [file ELSC-19-658-s001.pdf]

# Supplementary information to “Production of polycaprolactone nanoparticles for targeted drug delivery with hydrodynamic diameters below 100 nm”

Authors: Sandra ~~Kuhlmeier~~Witt, Thomas Scheper, Johanna-Gabriela Walter

## Preparation of Polymers

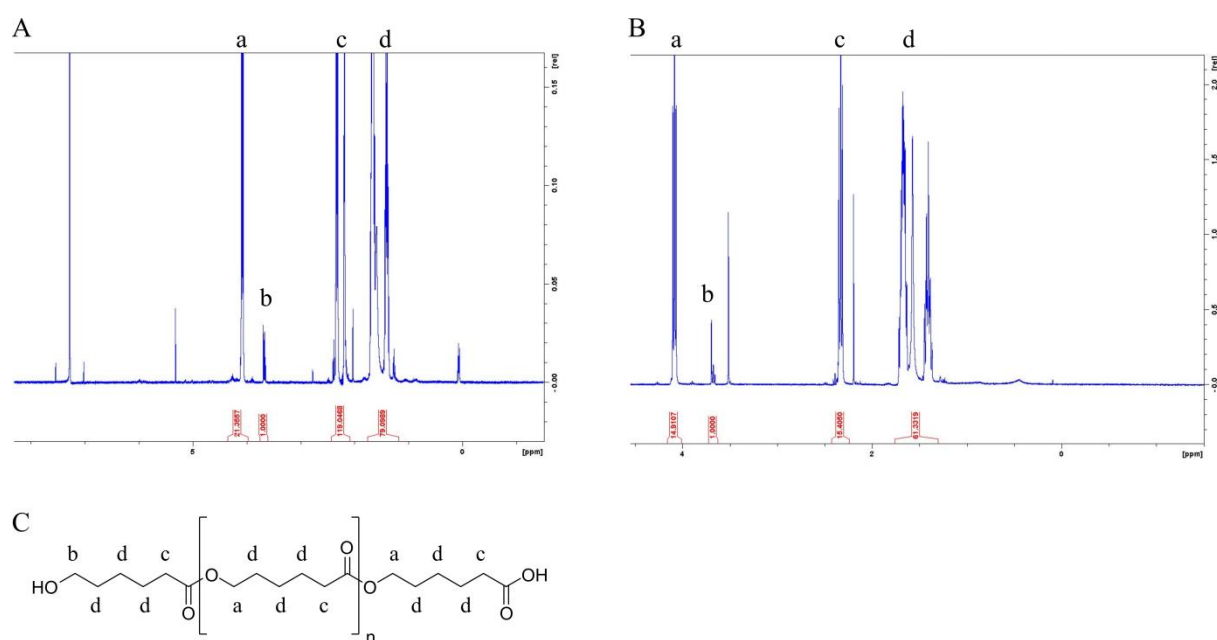

Figure S1:  $^1\text{H-NMR}$  spectra of the  $\text{PCL}_{1.8}$  (A) and  $\text{PCL}_{13.6}$  (B) with assignment of peaks to the structural formula of PCL (C).

## Preparation of PCL-PTX-NP

A

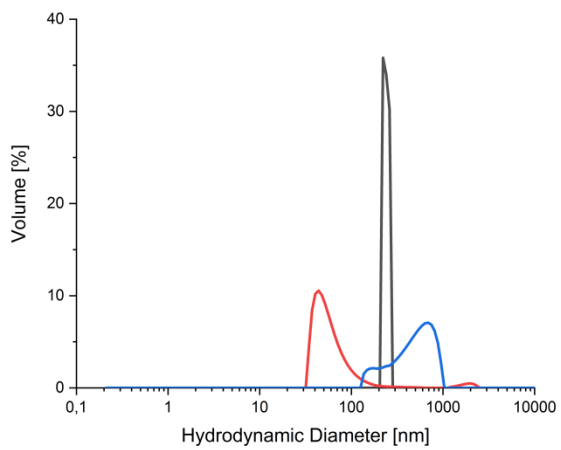

B

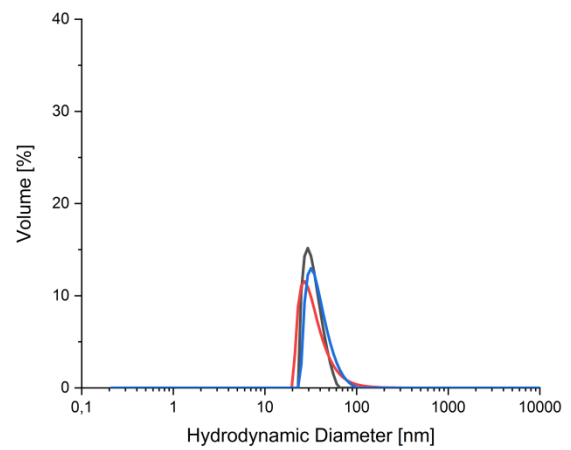

C

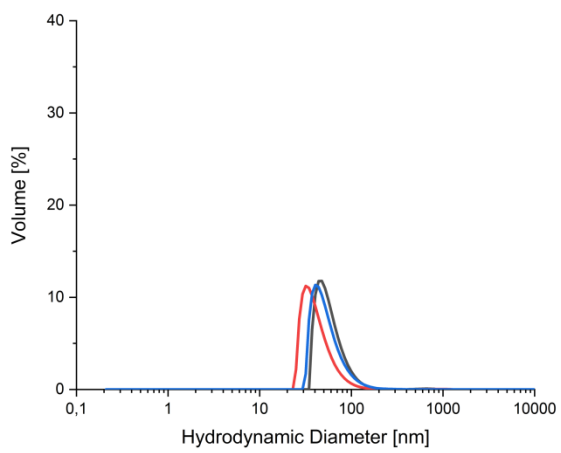

Figure S2: Size distribution of nanoparticles with encapsulated PTX generated from different PCL-length polymers. A: PTX-PCL<sub>1.8</sub>-NP, B: PTX-PCL<sub>5.4</sub>-NP, C: PTX-PCL<sub>13.6</sub>-NP.

## Functionalization of PCL<sub>5.4</sub> with the aptamer S15

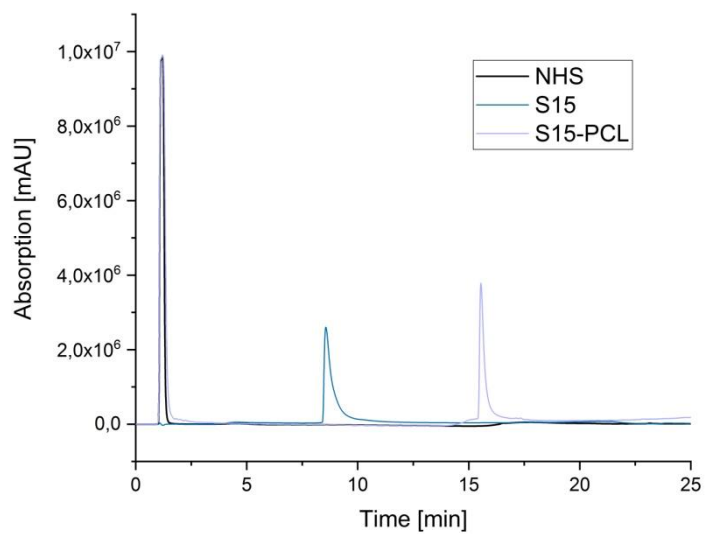

Figure S3: Chromatogram of the RP-HPLC of S15, the S15-PCL<sub>5.4</sub> and NHS at 260 nm. The S15-PCL<sub>5.4</sub> shows a shift in elution time from 8 min to 16 min, compared to the uncoupled S15. NHS, which also absorbs at 260 nm, elutes after 1 minute.
